# Supplementary material
Source: publisher figshare collection journal article supplement (https://karger.figshare.com/ndownloader/files/12822062)
Supplement: Supplementary file 1 [file 12822062]

***Supplementary table***

Table S1. Changes in immune parameters following MDA in helminth negative (a) and positive (b) children

a

| Parameter | Baseline  (median, IQR) | Follow up  (median, IQR) | Estimate  (95% CI) | P value |
| --- | --- | --- | --- | --- |
| Total IgE  (IU/mL) | 670.58  (348.18 – 907.91, n=111) | 116.15  (35.95 – 633.75, n=86) | 0.31  (0.22-0.44) | <0.0001 |
| Eosinophil count (%) | 8  (6 – 11, n=115) | 5  (3 – 8, n=83) | 0.69  (0.58-0.81) | <0.0001 |
| CRP  (mg/L) | 1.69  (0.42 – 6.23, n= 115) | 1.18  (0.40 – 3.47, n=86) | 0.64  (0.43-0.95) | 0.03 |

b

| Parameter | Baseline  (median, IQR) | Follow up  (median, IQR) | Estimate  (95% CI) | P value |
| --- | --- | --- | --- | --- |
| Total IgE  (IU/mL) | 510.22  (185.11 – 871.65, n=28) | 65.71  (13.67 – 479.79, n=22) | 0.26  ( 0.11-0.61) | 0.005 |
| Eosinophil count (%) | 5  (3 – 9, n=28) | 3  (3 – 6, n=24) | 0.74  (0.59-0.93) | 0.02 |
| CRP  (mg/L) | 2.62  (0.71 – 8.08, n= 28) | 0.80  (0.11 – 7.89, n=22) | 0.43  (0.17-1.09) | 0.08 |

Estimated changes of total IgE, eosinophil count and CRP following MDA are displayed with corresponding 95% CI. Estimate and 95% confidence interval are based on generalized linear mixed models from the log-transformed data. Values shown are back-transformed. P values are generated using a likelihood ratio test comparing a model with and without a time effect.
